# Supplementary material
Source: MDPI journal article supplement (https://www.mdpi.com/2304-6740/9/1/4)

# checkCIF/PLATON report

Structure factors have been supplied for datablock(s) er078\_sq

THIS REPORT IS FOR GUIDANCE ONLY. IF USED AS PART OF A REVIEW PROCEDURE FOR PUBLICATION, IT SHOULD NOT REPLACE THE EXPERTISE OF AN EXPERIENCED CRYSTALLOGRAPHIC REFEREE.

No syntax errors found.      CIF dictionary      Interpreting this report

## Datablock: er078\_sq

---

|                 |                                          |                                     |
|-----------------|------------------------------------------|-------------------------------------|
| Bond precision: | C-C = 0.0062 A                           | Wavelength=0.71073                  |
| Cell:           | a=13.4894(6)                             | b=14.8036(6)      c=17.0021(6)      |
|                 | alpha=64.769(4)                          | beta=73.282(4)      gamma=86.538(4) |
| Temperature:    | 150 K                                    |                                     |
|                 | Calculated                               | Reported                            |
| Volume          | 2933.9(2)                                | 2933.9(2)                           |
| Space group     | P -1                                     | P -1                                |
| Hall group      | -P 1                                     | -P 1                                |
| Moiety formula  | C73 H63 Li4 N13 O41 Zn4 [+ ?<br>solvent] |                                     |
| Sum formula     | C73 H63 Li4 N13 O41 Zn4 [+<br>solvent]   | C88 H98 Li4 N18 O46 Zn4             |
| Mr              | 2067.69                                  | 2433.08                             |
| Dx, g cm-3      | 1.170                                    | 1.377                               |
| Z               | 1                                        | 1                                   |
| Mu (mm-1)       | 0.883                                    | 0.899                               |
| F000            | 1052.0                                   | 1252.0                              |
| F000'           | 1053.69                                  |                                     |
| h,k,lmax        | 18,20,23                                 | 18,18,22                            |
| Nref            | 15601                                    | 12851                               |
| Tmin,Tmax       | 0.744,0.956                              | 0.747,1.000                         |
| Tmin'           | 0.729                                    |                                     |

Correction method= # Reported T Limits: Tmin=0.747 Tmax=1.000  
AbsCorr = MULTI-SCAN

Data completeness= 0.824      Theta(max)= 28.999

R(reflections)= 0.0633( 9028)      wR2(reflections)= 0.2064( 12851)

S = 1.067      Npar= 697

---

The following ALERTS were generated. Each ALERT has the format

**test-name\_ALERT\_alert-type\_alert-level.**

Click on the hyperlinks for more details of the test.

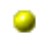

### Alert level C

|                   |                                                  |           |       |                             |         |        |
|-------------------|--------------------------------------------------|-----------|-------|-----------------------------|---------|--------|
| PLAT220_ALERT_2_C | NonSolvent                                       | Resd 1    | C     | Ueq(max)/Ueq(min) Range     | 4.4     | Ratio  |
| PLAT220_ALERT_2_C | NonSolvent                                       | Resd 1    | N     | Ueq(max)/Ueq(min) Range     | 4.0     | Ratio  |
| PLAT220_ALERT_2_C | NonSolvent                                       | Resd 1    | O     | Ueq(max)/Ueq(min) Range     | 3.2     | Ratio  |
| PLAT222_ALERT_3_C | NonSolvent                                       | Resd 1    | H     | Uiso(max)/Uiso(min) Range   | 4.9     | Ratio  |
| PLAT241_ALERT_2_C | High                                             | 'MainMol' | Ueq   | as Compared to Neighbors of | 011     | Check  |
| PLAT241_ALERT_2_C | High                                             | 'MainMol' | Ueq   | as Compared to Neighbors of | 014     | Check  |
| PLAT241_ALERT_2_C | High                                             | 'MainMol' | Ueq   | as Compared to Neighbors of | 022     | Check  |
| PLAT242_ALERT_2_C | Low                                              | 'MainMol' | Ueq   | as Compared to Neighbors of | Zn1     | Check  |
| PLAT341_ALERT_3_C | Low Bond Precision on                            | C-C Bonds | ..... |                             | 0.00625 | Ang.   |
| PLAT906_ALERT_3_C | Large K Value in the Analysis of Variance        | .....     |       |                             | 2.721   | Check  |
| PLAT910_ALERT_3_C | Missing # of FCF Reflection(s) Below Theta(Min). |           |       |                             | 5       | Note   |
| PLAT911_ALERT_3_C | Missing FCF Refl Between Thmin & STh/L=          | 0.600     |       |                             | 15      | Report |
| PLAT934_ALERT_3_C | Number of (Iobs-Icalc)/Sigma(W) > 10 Outliers .. |           |       |                             | 1       | Check  |

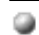

### Alert level G

FORMU01\_ALERT\_2\_G There is a discrepancy between the atom counts in the  
     \_chemical\_formula\_sum and the formula from the \_atom\_site\* data.  
     Atom count from \_chemical\_formula\_sum: C88 H98 Li4 N18 O46 Zn4  
     Atom count from the \_atom\_site data: C73 H63 Li4 N13 O41 Zn4

CELLZ01\_ALERT\_1\_G Difference between formula and atom\_site contents detected.  
 CELLZ01\_ALERT\_1\_G ALERT: Large difference may be due to a  
     symmetry error - see SYMMG tests  
     From the CIF: \_cell\_formula\_units\_Z 1  
     From the CIF: \_chemical\_formula\_sum C88 H98 Li4 N18 O46 Zn4  
     TEST: Compare cell contents of formula and atom\_site data

| atom | Z*formula | cif sites | diff  |
|------|-----------|-----------|-------|
| C    | 88.00     | 73.00     | 15.00 |
| H    | 98.00     | 63.00     | 35.00 |
| Li   | 4.00      | 4.00      | 0.00  |
| N    | 18.00     | 13.00     | 5.00  |
| O    | 46.00     | 41.00     | 5.00  |
| Zn   | 4.00      | 4.00      | 0.00  |

|                   |                                                  |        |        |
|-------------------|--------------------------------------------------|--------|--------|
| PLAT002_ALERT_2_G | Number of Distance or Angle Restraints on AtSite | 21     | Note   |
| PLAT003_ALERT_2_G | Number of Uiso or Uij Restrained non-H Atoms ... | 34     | Report |
| PLAT004_ALERT_5_G | Polymeric Structure Found with Maximum Dimension | 2      | Info   |
| PLAT041_ALERT_1_G | Calc. and Reported SumFormula Strings Differ     | Please | Check  |
| PLAT068_ALERT_1_G | Reported F000 Differs from Calcd (or Missing)... | Please | Check  |
| PLAT154_ALERT_1_G | The s.u.'s on the Cell Angles are Equal ..(Note) | 0.004  | Degree |
| PLAT168_ALERT_4_G | The CIF-Embedded .res File Contains EXYZ Records | 2      | Report |
| PLAT171_ALERT_4_G | The CIF-Embedded .res File Contains EADP Records | 2      | Report |
| PLAT174_ALERT_4_G | The CIF-Embedded .res File Contains FLAT Records | 1      | Report |
| PLAT176_ALERT_4_G | The CIF-Embedded .res File Contains SADI Records | 7      | Report |
| PLAT178_ALERT_4_G | The CIF-Embedded .res File Contains SIMU Records | 5      | Report |
| PLAT300_ALERT_4_G | Atom Site Occupancy of O1D                       | 0.5    | Check  |
| PLAT300_ALERT_4_G | Atom Site Occupancy of N1D                       | 0.5    | Check  |
| PLAT300_ALERT_4_G | Atom Site Occupancy of Cl1D                      | 0.5    | Check  |
| PLAT300_ALERT_4_G | Atom Site Occupancy of Cl2D                      | 0.5    | Check  |
| PLAT300_ALERT_4_G | Atom Site Occupancy of Cl3D                      | 0.5    | Check  |
| PLAT300_ALERT_4_G | Atom Site Occupancy of H11D                      | 0.5    | Check  |
| PLAT300_ALERT_4_G | Atom Site Occupancy of H12A                      | 0.5    | Check  |
| PLAT300_ALERT_4_G | Atom Site Occupancy of H12B                      | 0.5    | Check  |
| PLAT300_ALERT_4_G | Atom Site Occupancy of H12C                      | 0.5    | Check  |
| PLAT300_ALERT_4_G | Atom Site Occupancy of H13A                      | 0.5    | Check  |

|                   |                                                  |                |           |       |
|-------------------|--------------------------------------------------|----------------|-----------|-------|
| PLAT300_ALERT_4_G | Atom Site Occupancy of H13B                      | Constrained at | 0.5       | Check |
| PLAT300_ALERT_4_G | Atom Site Occupancy of H13C                      | Constrained at | 0.5       | Check |
| PLAT301_ALERT_3_G | Main Residue Disorder .....                      | (Resd 1 )      | 17%       | Note  |
| PLAT380_ALERT_4_G | Incorrectly? Oriented X(sp2)-Methyl Moiety ..... |                | C12D      | Check |
| PLAT380_ALERT_4_G | Incorrectly? Oriented X(sp2)-Methyl Moiety ..... |                | C13D      | Check |
| PLAT380_ALERT_4_G | Incorrectly? Oriented X(sp2)-Methyl Moiety ..... |                | C22D      | Check |
| PLAT380_ALERT_4_G | Incorrectly? Oriented X(sp2)-Methyl Moiety ..... |                | C23D      | Check |
| PLAT380_ALERT_4_G | Incorrectly? Oriented X(sp2)-Methyl Moiety ..... |                | C32D      | Check |
| PLAT380_ALERT_4_G | Incorrectly? Oriented X(sp2)-Methyl Moiety ..... |                | C33D      | Check |
| PLAT413_ALERT_2_G | Short Inter XH3 .. XHn                           | H12B ..H23A    | 1.73 Ang. |       |
|                   |                                                  | 1+x,y,z =      | 1_655     | Check |
| PLAT606_ALERT_4_G | Solvent Accessible VOID(S) in Structure .....    |                | !         | Info  |
| PLAT860_ALERT_3_G | Number of Least-Squares Restraints .....         |                | 309       | Note  |
| PLAT869_ALERT_4_G | ALERTS Related to the Use of SQUEEZE Suppressed  |                | !         | Info  |
| PLAT912_ALERT_4_G | Missing # of FCF Reflections Above STh/L=        | 0.600          | 2555      | Note  |
| PLAT933_ALERT_2_G | Number of OMIT Records in Embedded .res File ... |                | 7         | Note  |
| PLAT941_ALERT_3_G | Average HKL Measurement Multiplicity .....       |                | 2.0       | Low   |
| PLAT951_ALERT_5_G | Calculated (ThMax) and CIF-Reported Kmax Differ  |                | 2         | Units |
| PLAT957_ALERT_1_G | Calculated (ThMax) and Actual (FCF) Kmax Differ  |                | 2         | Units |
| PLAT961_ALERT_5_G | Dataset Contains no Negative Intensities .....   |                | Please    | Check |
| PLAT978_ALERT_2_G | Number C-C Bonds with Positive Residual Density. |                | 0         | Info  |

---

0 **ALERT level A** = Most likely a serious problem - resolve or explain  
 0 **ALERT level B** = A potentially serious problem, consider carefully  
 13 **ALERT level C** = Check. Ensure it is not caused by an omission or oversight  
 44 **ALERT level G** = General information/check it is not something unexpected

6 ALERT type 1 CIF construction/syntax error, inconsistent or missing data  
 13 ALERT type 2 Indicator that the structure model may be wrong or deficient  
 9 ALERT type 3 Indicator that the structure quality may be low  
 26 ALERT type 4 Improvement, methodology, query or suggestion  
 3 ALERT type 5 Informative message, check

---

It is advisable to attempt to resolve as many as possible of the alerts in all categories. Often the minor alerts point to easily fixed oversights, errors and omissions in your CIF or refinement strategy, so attention to these fine details can be worthwhile. In order to resolve some of the more serious problems it may be necessary to carry out additional measurements or structure refinements. However, the purpose of your study may justify the reported deviations and the more serious of these should normally be commented upon in the discussion or experimental section of a paper or in the "special\_details" fields of the CIF. checkCIF was carefully designed to identify outliers and unusual parameters, but every test has its limitations and alerts that are not important in a particular case may appear. Conversely, the absence of alerts does not guarantee there are no aspects of the results needing attention. It is up to the individual to critically assess their own results and, if necessary, seek expert advice.

### **Publication of your CIF in IUCr journals**

A basic structural check has been run on your CIF. These basic checks will be run on all CIFs submitted for publication in IUCr journals (*Acta Crystallographica*, *Journal of Applied Crystallography*, *Journal of Synchrotron Radiation*); however, if you intend to submit to *Acta Crystallographica Section C* or *E* or *IUCrData*, you should make sure that full publication checks are run on the final version of your CIF prior to submission.

### **Publication of your CIF in other journals**

Please refer to the *Notes for Authors* of the relevant journal for any special instructions relating to CIF submission.

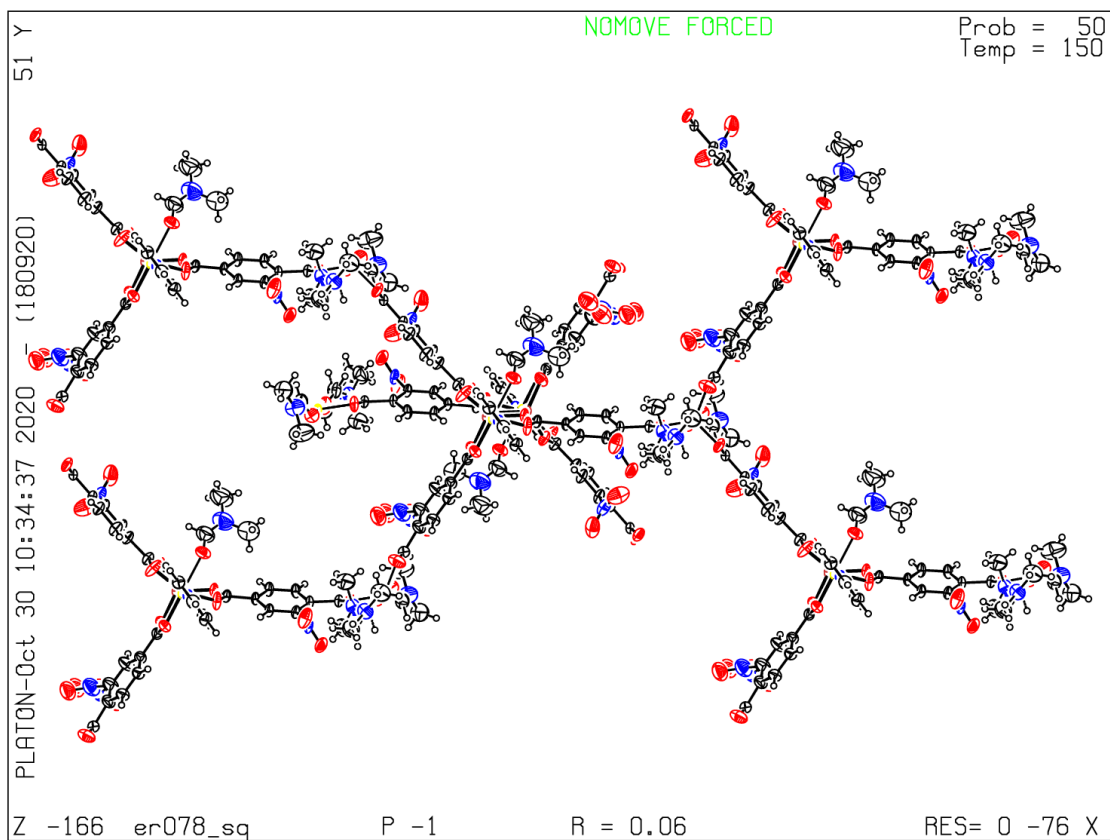

Supplement: s1 [file s1]
