# Supplementary material
Source: MDPI journal article supplement (https://www.mdpi.com/2304-6740/9/1/4)

# checkCIF/PLATON report

Structure factors have been supplied for datablock(s) er022

THIS REPORT IS FOR GUIDANCE ONLY. IF USED AS PART OF A REVIEW PROCEDURE FOR PUBLICATION, IT SHOULD NOT REPLACE THE EXPERTISE OF AN EXPERIENCED CRYSTALLOGRAPHIC REFEREE.

No syntax errors found.      CIF dictionary      Interpreting this report

## Datablock: er022

---

|                        |                                                                       |                                |
|------------------------|-----------------------------------------------------------------------|--------------------------------|
| Bond precision:        | C-C = 0.0049 Å                                                        | Wavelength=0.71073             |
| Cell:                  | a=9.9681(3)                                                           | b=15.9931(6)      c=16.2939(6) |
|                        | alpha=90                                                              | beta=92.160(3)      gamma=90   |
| Temperature:           | 150 K                                                                 |                                |
|                        | Calculated                                                            | Reported                       |
| Volume                 | 2595.74(16)                                                           | 2595.74(16)                    |
| Space group            | P 21/n                                                                | P 21/n                         |
| Hall group             | -P 2yn                                                                | -P 2yn                         |
| Moiety formula         | 2(C16 H8 Li O8 Zn),<br>2(C0.75 H1.75 N0.25<br>O0.25), 2(C0.75 H1.75 N | ?                              |
| Sum formula            | C41 H42 Li2 N4 O17 Zn2                                                | C41 H42 Li2 N4 O17 Zn2         |
| Mr                     | 1007.45                                                               | 1007.40                        |
| Dx, g cm <sup>-3</sup> | 1.289                                                                 | 1.289                          |
| Z                      | 2                                                                     | 2                              |
| Mu (mm <sup>-1</sup> ) | 0.990                                                                 | 0.990                          |
| F000                   | 1036.0                                                                | 1036.0                         |
| F000'                  | 1037.64                                                               |                                |
| h,k,lmax               | 13,21,22                                                              | 12,20,20                       |
| Nref                   | 6864                                                                  | 5802                           |
| Tmin,Tmax              | 0.779,0.837                                                           | 0.898,1.000                    |
| Tmin'                  | 0.750                                                                 |                                |

Correction method= # Reported T Limits: Tmin=0.898 Tmax=1.000  
AbsCorr = MULTI-SCAN

Data completeness= 0.845      Theta(max)= 28.926

R(reflections)= 0.0536( 4603)      wR2(reflections)= 0.1717( 5802)

S = 1.093      Npar= 406

---

The following ALERTS were generated. Each ALERT has the format

**test-name\_ALERT\_alert-type\_alert-level.**

Click on the hyperlinks for more details of the test.

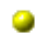

### Alert level C

|                   |                                                  |                                           |        |        |
|-------------------|--------------------------------------------------|-------------------------------------------|--------|--------|
| PLAT241_ALERT_2_C | High                                             | 'MainMol' Ueq as Compared to Neighbors of | 012    | Check  |
| PLAT241_ALERT_2_C | High                                             | 'MainMol' Ueq as Compared to Neighbors of | 032    | Check  |
| PLAT242_ALERT_2_C | Low                                              | 'MainMol' Ueq as Compared to Neighbors of | Zn1    | Check  |
| PLAT420_ALERT_2_C | D-H Without Acceptor                             | N2N --H2NA .                              | Please | Check  |
| PLAT420_ALERT_2_C | D-H Without Acceptor                             | N2N --H2NB .                              | Please | Check  |
| PLAT906_ALERT_3_C | Large K Value in the Analysis of Variance .....  |                                           | 3.244  | Check  |
| PLAT911_ALERT_3_C | Missing FCF Refl Between Thmin & STh/L=          | 0.600                                     | 27     | Report |
| PLAT913_ALERT_3_C | Missing # of Very Strong Reflections in FCF .... |                                           | 4      | Note   |
| PLAT975_ALERT_2_C | Check Calcd Resid. Dens.                         | 0.81A From Old                            | 0.43   | eA-3   |
| PLAT977_ALERT_2_C | Check Negative Difference Density on H2NB        |                                           | -0.42  | eA-3   |

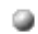

### Alert level G

|                   |                                                  |                |      |        |
|-------------------|--------------------------------------------------|----------------|------|--------|
| PLAT002_ALERT_2_G | Number of Distance or Angle Restraints on AtSite |                | 16   | Note   |
| PLAT003_ALERT_2_G | Number of Uiso or Uij Restrained non-H Atoms ... |                | 19   | Report |
| PLAT004_ALERT_5_G | Polymeric Structure Found with Maximum Dimension |                | 3    | Info   |
| PLAT007_ALERT_5_G | Number of Unrefined Donor-H Atoms .....          |                | 4    | Report |
| PLAT172_ALERT_4_G | The CIF-Embedded .res File Contains DFIX Records |                | 5    | Report |
| PLAT174_ALERT_4_G | The CIF-Embedded .res File Contains FLAT Records |                | 1    | Report |
| PLAT176_ALERT_4_G | The CIF-Embedded .res File Contains SADI Records |                | 2    | Report |
| PLAT178_ALERT_4_G | The CIF-Embedded .res File Contains SIMU Records |                | 2    | Report |
| PLAT300_ALERT_4_G | Atom Site Occupancy of O1D                       | Constrained at | 0.25 | Check  |
| PLAT300_ALERT_4_G | Atom Site Occupancy of N1D                       | Constrained at | 0.25 | Check  |
| PLAT300_ALERT_4_G | Atom Site Occupancy of Cl1D                      | Constrained at | 0.25 | Check  |
| PLAT300_ALERT_4_G | Atom Site Occupancy of Cl2D                      | Constrained at | 0.25 | Check  |
| PLAT300_ALERT_4_G | Atom Site Occupancy of Cl3D                      | Constrained at | 0.25 | Check  |
| PLAT300_ALERT_4_G | Atom Site Occupancy of H11D                      | Constrained at | 0.25 | Check  |
| PLAT300_ALERT_4_G | Atom Site Occupancy of H12D                      | Constrained at | 0.25 | Check  |
| PLAT300_ALERT_4_G | Atom Site Occupancy of H12E                      | Constrained at | 0.25 | Check  |
| PLAT300_ALERT_4_G | Atom Site Occupancy of H12F                      | Constrained at | 0.25 | Check  |
| PLAT300_ALERT_4_G | Atom Site Occupancy of H13A                      | Constrained at | 0.25 | Check  |
| PLAT300_ALERT_4_G | Atom Site Occupancy of H13B                      | Constrained at | 0.25 | Check  |
| PLAT300_ALERT_4_G | Atom Site Occupancy of H13C                      | Constrained at | 0.25 | Check  |
| PLAT300_ALERT_4_G | Atom Site Occupancy of O2D                       | Constrained at | 0.25 | Check  |
| PLAT300_ALERT_4_G | Atom Site Occupancy of N2D                       | Constrained at | 0.25 | Check  |
| PLAT300_ALERT_4_G | Atom Site Occupancy of C21D                      | Constrained at | 0.25 | Check  |
| PLAT300_ALERT_4_G | Atom Site Occupancy of C22D                      | Constrained at | 0.25 | Check  |
| PLAT300_ALERT_4_G | Atom Site Occupancy of C23D                      | Constrained at | 0.25 | Check  |
| PLAT300_ALERT_4_G | Atom Site Occupancy of H21D                      | Constrained at | 0.25 | Check  |
| PLAT300_ALERT_4_G | Atom Site Occupancy of H22D                      | Constrained at | 0.25 | Check  |
| PLAT300_ALERT_4_G | Atom Site Occupancy of H22E                      | Constrained at | 0.25 | Check  |
| PLAT300_ALERT_4_G | Atom Site Occupancy of H22F                      | Constrained at | 0.25 | Check  |
| PLAT300_ALERT_4_G | Atom Site Occupancy of H23A                      | Constrained at | 0.25 | Check  |
| PLAT300_ALERT_4_G | Atom Site Occupancy of H23B                      | Constrained at | 0.25 | Check  |
| PLAT300_ALERT_4_G | Atom Site Occupancy of H23C                      | Constrained at | 0.25 | Check  |
| PLAT300_ALERT_4_G | Atom Site Occupancy of N1A                       | Constrained at | 0.5  | Check  |
| PLAT300_ALERT_4_G | Atom Site Occupancy of C1A                       | Constrained at | 0.5  | Check  |
| PLAT300_ALERT_4_G | Atom Site Occupancy of C2A                       | Constrained at | 0.5  | Check  |
| PLAT300_ALERT_4_G | Atom Site Occupancy of H2AA                      | Constrained at | 0.5  | Check  |
| PLAT300_ALERT_4_G | Atom Site Occupancy of H2AB                      | Constrained at | 0.5  | Check  |
| PLAT300_ALERT_4_G | Atom Site Occupancy of H2AC                      | Constrained at | 0.5  | Check  |
| PLAT300_ALERT_4_G | Atom Site Occupancy of N1N                       | Constrained at | 0.5  | Check  |
| PLAT300_ALERT_4_G | Atom Site Occupancy of Cl1N                      | Constrained at | 0.5  | Check  |
| PLAT300_ALERT_4_G | Atom Site Occupancy of Cl2N                      | Constrained at | 0.5  | Check  |
| PLAT300_ALERT_4_G | Atom Site Occupancy of H1NA                      | Constrained at | 0.5  | Check  |

|                   |                                                  |                |        |       |
|-------------------|--------------------------------------------------|----------------|--------|-------|
| PLAT300_ALERT_4_G | Atom Site Occupancy of H1NB                      | Constrained at | 0.5    | Check |
| PLAT300_ALERT_4_G | Atom Site Occupancy of H11A                      | Constrained at | 0.5    | Check |
| PLAT300_ALERT_4_G | Atom Site Occupancy of H11B                      | Constrained at | 0.5    | Check |
| PLAT300_ALERT_4_G | Atom Site Occupancy of H11C                      | Constrained at | 0.5    | Check |
| PLAT300_ALERT_4_G | Atom Site Occupancy of H12A                      | Constrained at | 0.5    | Check |
| PLAT300_ALERT_4_G | Atom Site Occupancy of H12B                      | Constrained at | 0.5    | Check |
| PLAT300_ALERT_4_G | Atom Site Occupancy of H12C                      | Constrained at | 0.5    | Check |
| PLAT300_ALERT_4_G | Atom Site Occupancy of N2N                       | Constrained at | 0.5    | Check |
| PLAT300_ALERT_4_G | Atom Site Occupancy of C21N                      | Constrained at | 0.5    | Check |
| PLAT300_ALERT_4_G | Atom Site Occupancy of C22N                      | Constrained at | 0.5    | Check |
| PLAT300_ALERT_4_G | Atom Site Occupancy of H2NA                      | Constrained at | 0.5    | Check |
| PLAT300_ALERT_4_G | Atom Site Occupancy of H2NB                      | Constrained at | 0.5    | Check |
| PLAT300_ALERT_4_G | Atom Site Occupancy of H21A                      | Constrained at | 0.5    | Check |
| PLAT300_ALERT_4_G | Atom Site Occupancy of H21B                      | Constrained at | 0.5    | Check |
| PLAT300_ALERT_4_G | Atom Site Occupancy of H21C                      | Constrained at | 0.5    | Check |
| PLAT300_ALERT_4_G | Atom Site Occupancy of H22A                      | Constrained at | 0.5    | Check |
| PLAT300_ALERT_4_G | Atom Site Occupancy of H22B                      | Constrained at | 0.5    | Check |
| PLAT300_ALERT_4_G | Atom Site Occupancy of H22C                      | Constrained at | 0.5    | Check |
| PLAT302_ALERT_4_G | Anion/Solvent/Minor-Residue Disorder (Resd 2 )   |                | 100%   | Note  |
| PLAT302_ALERT_4_G | Anion/Solvent/Minor-Residue Disorder (Resd 3 )   |                | 100%   | Note  |
| PLAT302_ALERT_4_G | Anion/Solvent/Minor-Residue Disorder (Resd 4 )   |                | 100%   | Note  |
| PLAT302_ALERT_4_G | Anion/Solvent/Minor-Residue Disorder (Resd 5 )   |                | 100%   | Note  |
| PLAT302_ALERT_4_G | Anion/Solvent/Minor-Residue Disorder (Resd 6 )   |                | 100%   | Note  |
| PLAT411_ALERT_2_G | Short Inter H...H Contact H37 ..H21D .           |                | 2.14   | Ang.  |
|                   | -1/2+x,1/2-y,-1/2+z =                            |                | 4_565  | Check |
| PLAT413_ALERT_2_G | Short Inter XH3 .. XHn H21B ..H36 .              |                | 1.90   | Ang.  |
|                   | 1/2+x,1/2-y,1/2+z =                              |                | 4_666  | Check |
| PLAT432_ALERT_2_G | Short Inter X...Y Contact O12 ..C11N             |                | 2.90   | Ang.  |
|                   | 3/2-x,-1/2+y,3/2-z =                             |                | 2_646  | Check |
| PLAT720_ALERT_4_G | Number of Unusual/Non-Standard Labels .....      |                | 7      | Note  |
| PLAT811_ALERT_5_G | No ADDSYM Analysis: Too Many Excluded Atoms .... |                | !      | Info  |
| PLAT860_ALERT_3_G | Number of Least-Squares Restraints .....         |                | 220    | Note  |
| PLAT910_ALERT_3_G | Missing # of FCF Reflection(s) Below Theta(Min). |                | 2      | Note  |
| PLAT912_ALERT_4_G | Missing # of FCF Reflections Above STh/L= 0.600  |                | 885    | Note  |
| PLAT933_ALERT_2_G | Number of OMIT Records in Embedded .res File ... |                | 15     | Note  |
| PLAT941_ALERT_3_G | Average HKL Measurement Multiplicity .....       |                | 2.2    | Low   |
| PLAT952_ALERT_5_G | Calculated (ThMax) and CIF-Reported Lmax Differ  |                | 2      | Units |
| PLAT958_ALERT_1_G | Calculated (ThMax) and Actual (FCF) Lmax Differ  |                | 2      | Units |
| PLAT961_ALERT_5_G | Dataset Contains no Negative Intensities .....   |                | Please | Check |
| PLAT978_ALERT_2_G | Number C-C Bonds with Positive Residual Density. |                | 3      | Info  |

---

0 **ALERT level A** = Most likely a serious problem - resolve or explain  
 0 **ALERT level B** = A potentially serious problem, consider carefully  
 10 **ALERT level C** = Check. Ensure it is not caused by an omission or oversight  
 79 **ALERT level G** = General information/check it is not something unexpected

1 ALERT type 1 CIF construction/syntax error, inconsistent or missing data  
 14 ALERT type 2 Indicator that the structure model may be wrong or deficient  
 6 ALERT type 3 Indicator that the structure quality may be low  
 63 ALERT type 4 Improvement, methodology, query or suggestion  
 5 ALERT type 5 Informative message, check

---

It is advisable to attempt to resolve as many as possible of the alerts in all categories. Often the minor alerts point to easily fixed oversights, errors and omissions in your CIF or refinement strategy, so attention to these fine details can be worthwhile. In order to resolve some of the more serious problems it may be necessary to carry out additional measurements or structure refinements. However, the purpose of your study may justify the reported deviations and the more serious of these should normally be commented upon in the discussion or experimental section of a paper or in the "special\_details" fields of the CIF. checkCIF was carefully designed to identify outliers and unusual parameters, but every test has its limitations and alerts that are not important in a particular case may appear. Conversely, the absence of alerts does not guarantee there are no aspects of the results needing attention. It is up to the individual to critically assess their own results and, if necessary, seek expert advice.

### **Publication of your CIF in IUCr journals**

A basic structural check has been run on your CIF. These basic checks will be run on all CIFs submitted for publication in IUCr journals (*Acta Crystallographica*, *Journal of Applied Crystallography*, *Journal of Synchrotron Radiation*); however, if you intend to submit to *Acta Crystallographica Section C* or *E* or *IUCrData*, you should make sure that full publication checks are run on the final version of your CIF prior to submission.

### **Publication of your CIF in other journals**

Please refer to the *Notes for Authors* of the relevant journal for any special instructions relating to CIF submission.

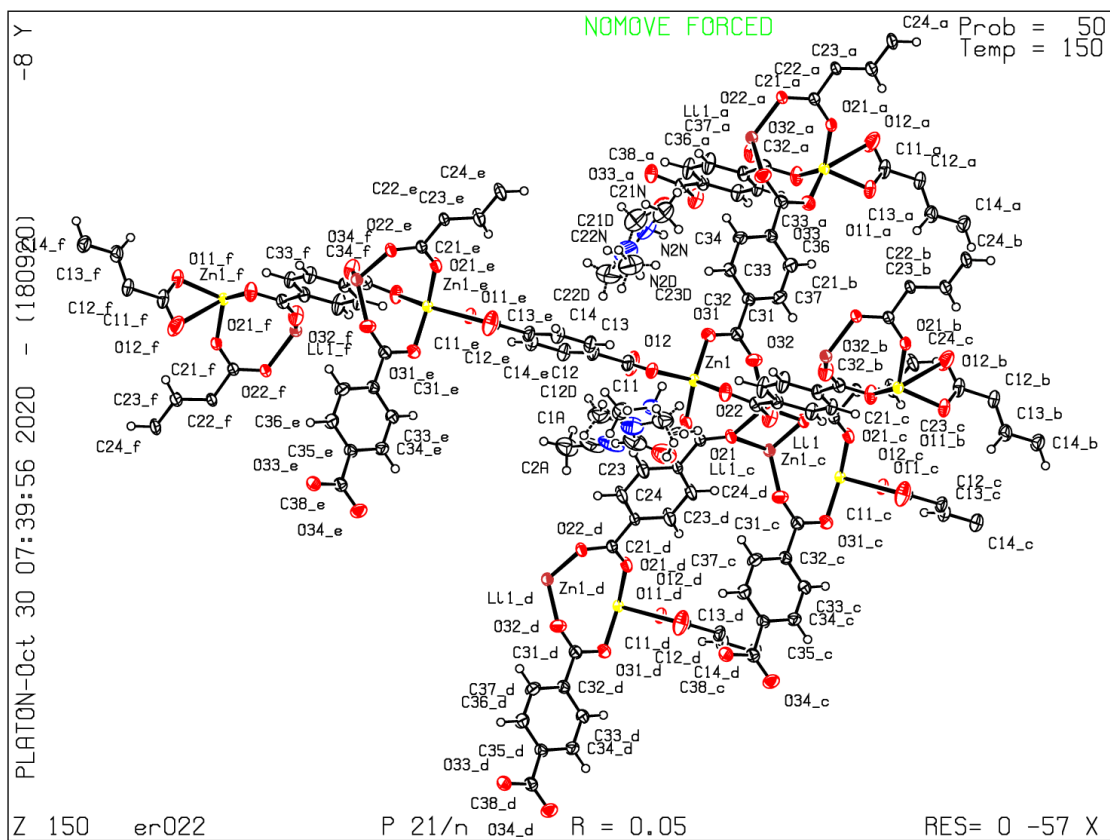

Supplement: s1 [file s1]
