# Supplementary material
Source: MDPI journal article supplement (https://www.mdpi.com/2304-6740/9/1/4)

# checkCIF/PLATON report

Structure factors have been supplied for datablock(s) er024\_sq

THIS REPORT IS FOR GUIDANCE ONLY. IF USED AS PART OF A REVIEW PROCEDURE FOR PUBLICATION, IT SHOULD NOT REPLACE THE EXPERTISE OF AN EXPERIENCED CRYSTALLOGRAPHIC REFEREE.

No syntax errors found.      CIF dictionary      Interpreting this report

## Datablock: er024\_sq

---

|                        |                                   |                                |
|------------------------|-----------------------------------|--------------------------------|
| Bond precision:        | C-C = 0.0058 A                    | Wavelength=0.71073             |
| Cell:                  | a=15.6794(4)                      | b=13.2596(4)      c=19.9294(6) |
|                        | alpha=90                          | beta=104.551(3)      gamma=90  |
| Temperature:           | 150 K                             |                                |
|                        | Calculated                        | Reported                       |
| Volume                 | 4010.5(2)                         | 4010.5(2)                      |
| Space group            | C 2/c                             | C 2/c                          |
| Hall group             | -C 2yc                            | -C 2yc                         |
| Moiety formula         | C36 H16 Li O12 Zn2 [+<br>solvent] | ?                              |
| Sum formula            | C36 H16 Li O12 Zn2 [+<br>solvent] | C40 H29 Li N2 O12 Zn2          |
| Mr                     | 778.21                            | 867.33                         |
| Dx, g cm <sup>-3</sup> | 1.289                             | 1.436                          |
| Z                      | 4                                 | 4                              |
| Mu (mm <sup>-1</sup> ) | 1.250                             | 1.260                          |
| F000                   | 1564.0                            | 1768.0                         |
| F000'                  | 1567.03                           |                                |
| h,k,lmax               | 21,18,27                          | 19,16,26                       |
| Nref                   | 5257                              | 4510                           |
| Tmin,Tmax              | 0.746,0.893                       | 0.951,1.000                    |
| Tmin'                  | 0.662                             |                                |

Correction method= # Reported T Limits: Tmin=0.951 Tmax=1.000  
AbsCorr = MULTI-SCAN

Data completeness= 0.858      Theta(max)= 28.881

R(reflections)= 0.0493( 4127)      wR2(reflections)= 0.1383( 4510)

S = 1.087      Npar= 249

---

The following ALERTS were generated. Each ALERT has the format

**test-name\_ALERT\_alert-type\_alert-level.**

Click on the hyperlinks for more details of the test.

### Alert level C

|                   |                                                  |                             |     |        |
|-------------------|--------------------------------------------------|-----------------------------|-----|--------|
| PLAT213_ALERT_2_C | Atom C105                                        | has ADP max/min Ratio ..... | 3.1 | prolat |
| PLAT911_ALERT_3_C | Missing FCF Refl Between Thmin & STh/L=          | 0.600                       | 3   | Report |
| PLAT918_ALERT_3_C | Reflection(s) with I(obs) much Smaller I(calc) . |                             | 4   | Check  |

### Alert level G

FORMU01\_ALERT\_2\_G There is a discrepancy between the atom counts in the  
\_chemical\_formula\_sum and the formula from the \_atom\_site\* data.

Atom count from \_chemical\_formula\_sum: C40 H29 Li1 N2 O12 Zn2

Atom count from the \_atom\_site data: C36 H16 Li1 O12 Zn2

CELLZ01\_ALERT\_1\_G Difference between formula and atom\_site contents detected.

CELLZ01\_ALERT\_1\_G ALERT: Large difference may be due to a

symmetry error - see SYMMG tests

From the CIF: \_cell\_formula\_units\_Z 4

From the CIF: \_chemical\_formula\_sum C40 H29 Li N2 O12 Zn2

TEST: Compare cell contents of formula and atom\_site data

| atom | Z*formula | cif sites | diff  |
|------|-----------|-----------|-------|
| C    | 160.00    | 144.00    | 16.00 |
| H    | 116.00    | 64.00     | 52.00 |
| Li   | 4.00      | 4.00      | 0.00  |
| N    | 8.00      | 0.00      | 8.00  |
| O    | 48.00     | 48.00     | 0.00  |
| Zn   | 8.00      | 8.00      | 0.00  |

|                   |                                                  |       |              |
|-------------------|--------------------------------------------------|-------|--------------|
| PLAT002_ALERT_2_G | Number of Distance or Angle Restraints on AtSite | 7     | Note         |
| PLAT003_ALERT_2_G | Number of Uiso or Uij Restrained non-H Atoms ... | 16    | Report       |
| PLAT004_ALERT_5_G | Polymeric Structure Found with Maximum Dimension | 3     | Info         |
| PLAT041_ALERT_1_G | Calc. and Reported SumFormula Strings Differ     |       | Please Check |
| PLAT068_ALERT_1_G | Reported F000 Differs from Calcd (or Missing)... |       | Please Check |
| PLAT083_ALERT_2_G | SHELXL Second Parameter in WGHT Unusually Large  | 22.95 | Why ?        |
| PLAT172_ALERT_4_G | The CIF-Embedded .res File Contains DFIX Records | 1     | Report       |
| PLAT176_ALERT_4_G | The CIF-Embedded .res File Contains SADI Records | 1     | Report       |
| PLAT178_ALERT_4_G | The CIF-Embedded .res File Contains SIMU Records | 2     | Report       |
| PLAT230_ALERT_2_G | Hirshfeld Test Diff for C203 --C204 .            | 11.0  | s.u.         |
| PLAT230_ALERT_2_G | Hirshfeld Test Diff for C207 --C208 .            | 11.3  | s.u.         |
| PLAT300_ALERT_4_G | Atom Site Occupancy of C204 Constrained at       | 0.5   | Check        |
| PLAT300_ALERT_4_G | Atom Site Occupancy of C205 Constrained at       | 0.5   | Check        |
| PLAT300_ALERT_4_G | Atom Site Occupancy of C206 Constrained at       | 0.5   | Check        |
| PLAT300_ALERT_4_G | Atom Site Occupancy of C207 Constrained at       | 0.5   | Check        |
| PLAT300_ALERT_4_G | Atom Site Occupancy of H204 Constrained at       | 0.5   | Check        |
| PLAT300_ALERT_4_G | Atom Site Occupancy of H205 Constrained at       | 0.5   | Check        |
| PLAT300_ALERT_4_G | Atom Site Occupancy of H206 Constrained at       | 0.5   | Check        |
| PLAT300_ALERT_4_G | Atom Site Occupancy of H207 Constrained at       | 0.5   | Check        |
| PLAT301_ALERT_3_G | Main Residue Disorder .....(Resd 1 )             | 8%    | Note         |
| PLAT333_ALERT_2_G | Large Aver C6-Ring C-C Dist C202 -C208_h .       | 1.46  | Ang.         |
| PLAT333_ALERT_2_G | Large Aver C6-Ring C-C Dist C203 -C208 .         | 1.46  | Ang.         |
| PLAT335_ALERT_2_G | Check Large C6 Ring C-C Range C203 -C208         | 0.16  | Ang.         |
| PLAT605_ALERT_4_G | Largest Solvent Accessible VOID in the Structure | 208   | A**3         |
| PLAT794_ALERT_5_G | Tentative Bond Valency for Zn1 (II) .            | 2.05  | Info         |
| PLAT860_ALERT_3_G | Number of Least-Squares Restraints .....         | 106   | Note         |
| PLAT869_ALERT_4_G | ALERTS Related to the Use of SQUEEZE Suppressed  | !     | Info         |
| PLAT912_ALERT_4_G | Missing # of FCF Reflections Above STh/L= 0.600  | 640   | Note         |
| PLAT933_ALERT_2_G | Number of OMIT Records in Embedded .res File ... | 3     | Note         |
| PLAT941_ALERT_3_G | Average HKL Measurement Multiplicity .....       | 2.3   | Low          |
| PLAT950_ALERT_5_G | Calculated (ThMax) and CIF-Reported Hmax Differ  | 2     | Units        |

|                   |                                                  |              |
|-------------------|--------------------------------------------------|--------------|
| PLAT951_ALERT_5_G | Calculated (ThMax) and CIF-Reported Kmax Differ  | 2 Units      |
| PLAT956_ALERT_1_G | Calculated (ThMax) and Actual (FCF) Hmax Differ  | 2 Units      |
| PLAT957_ALERT_1_G | Calculated (ThMax) and Actual (FCF) Kmax Differ  | 2 Units      |
| PLAT961_ALERT_5_G | Dataset Contains no Negative Intensities .....   | Please Check |
| PLAT978_ALERT_2_G | Number C-C Bonds with Positive Residual Density. | 4 Info       |

---

0 **ALERT level A** = Most likely a serious problem - resolve or explain  
0 **ALERT level B** = A potentially serious problem, consider carefully  
3 **ALERT level C** = Check. Ensure it is not caused by an omission or oversight  
39 **ALERT level G** = General information/check it is not something unexpected

6 ALERT type 1 CIF construction/syntax error, inconsistent or missing data  
12 ALERT type 2 Indicator that the structure model may be wrong or deficient  
5 ALERT type 3 Indicator that the structure quality may be low  
14 ALERT type 4 Improvement, methodology, query or suggestion  
5 ALERT type 5 Informative message, check

---

It is advisable to attempt to resolve as many as possible of the alerts in all categories. Often the minor alerts point to easily fixed oversights, errors and omissions in your CIF or refinement strategy, so attention to these fine details can be worthwhile. In order to resolve some of the more serious problems it may be necessary to carry out additional measurements or structure refinements. However, the purpose of your study may justify the reported deviations and the more serious of these should normally be commented upon in the discussion or experimental section of a paper or in the "special\_details" fields of the CIF. checkCIF was carefully designed to identify outliers and unusual parameters, but every test has its limitations and alerts that are not important in a particular case may appear. Conversely, the absence of alerts does not guarantee there are no aspects of the results needing attention. It is up to the individual to critically assess their own results and, if necessary, seek expert advice.

### Publication of your CIF in IUCr journals

A basic structural check has been run on your CIF. These basic checks will be run on all CIFs submitted for publication in IUCr journals (*Acta Crystallographica*, *Journal of Applied Crystallography*, *Journal of Synchrotron Radiation*); however, if you intend to submit to *Acta Crystallographica Section C* or *E* or *IUCrData*, you should make sure that full publication checks are run on the final version of your CIF prior to submission.

### Publication of your CIF in other journals

Please refer to the *Notes for Authors* of the relevant journal for any special instructions relating to CIF submission.

---

**PLATON version of 18/09/2020; check.def file version of 20/08/2020**

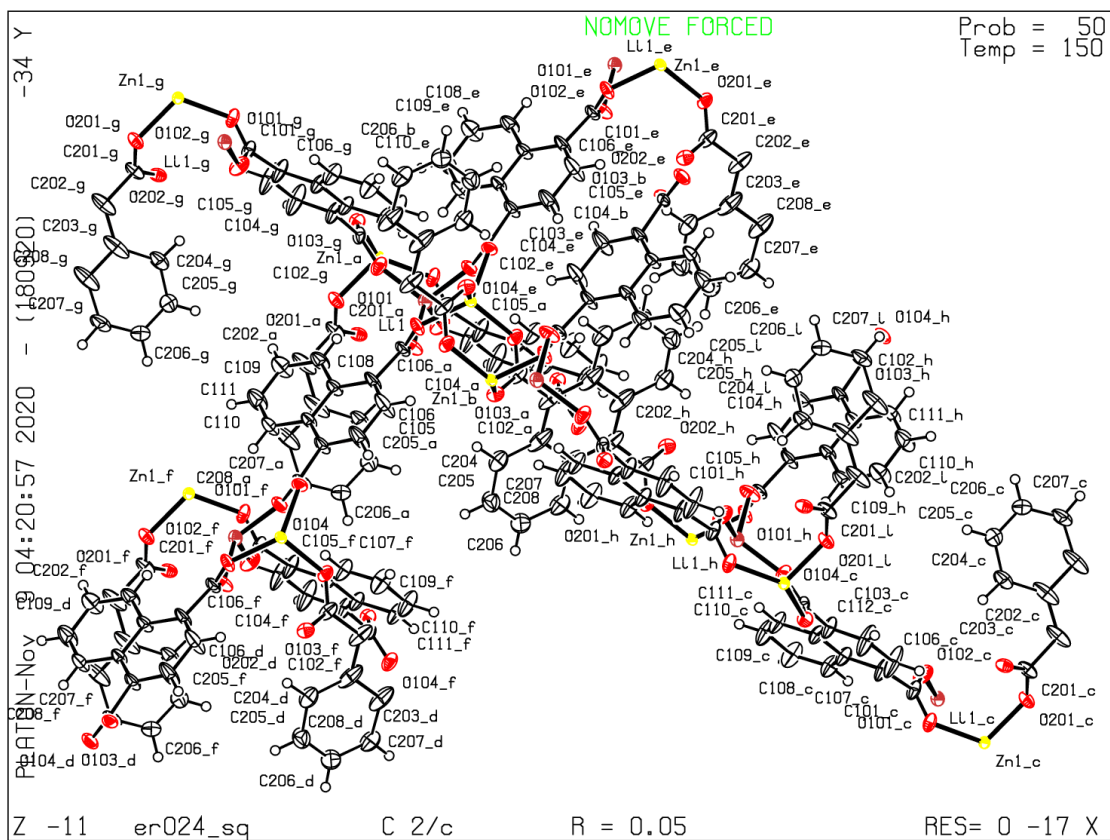

Supplement: s1 [file s1]
