# Supplementary material
Source: MDPI journal article supplement (https://www.mdpi.com/2304-6740/9/1/4)

# checkCIF/PLATON report

Structure factors have been supplied for datablock(s) Er011-1

THIS REPORT IS FOR GUIDANCE ONLY. IF USED AS PART OF A REVIEW PROCEDURE FOR PUBLICATION, IT SHOULD NOT REPLACE THE EXPERTISE OF AN EXPERIENCED CRYSTALLOGRAPHIC REFEREE.

No syntax errors found.      CIF dictionary      Interpreting this report

## Datablock: Er011-1

---

Bond precision:    C-C = 0.0098 A

Wavelength=0.79313

Cell:                a=9.675(5)                b=12.346(3)                c=12.523(2)  
                      alpha=80.897(16)    beta=71.847(16)    gamma=70.278(16)  
Temperature:    100 K

|                | Calculated                        | Reported                   |
|----------------|-----------------------------------|----------------------------|
| Volume         | 1335.7(8)                         | 1335.7(8)                  |
| Space group    | P -1                              | P -1                       |
| Hall group     | -P 1                              | -P 1                       |
| Moiety formula | C16 H5 Br4 Li O8 Zn, C4 H9<br>N O | ?                          |
| Sum formula    | C20 H14 Br4 Li N O9 Zn            | C40 H28 Br8 Li2 N2 O18 Zn2 |
| Mr             | 804.25                            | 1608.54                    |
| Dx,g cm-3      | 2.000                             | 2.000                      |
| Z              | 2                                 | 1                          |
| Mu (mm-1)      | 9.130                             | 9.131                      |
| F000           | 772.0                             | 772.0                      |
| F000'          | 766.13                            |                            |
| h,k,lmax       | 12,16,16                          | 12,15,16                   |
| Nref           | 6140                              | 5956                       |
| Tmin,Tmax      | 0.461,0.633                       | 0.675,1.000                |
| Tmin'          | 0.349                             |                            |

Correction method= # Reported T Limits: Tmin=0.675 Tmax=1.000

AbsCorr = MULTI-SCAN

Data completeness= 0.970

Theta(max)= 31.016

R(reflections)= 0.0624( 5265)

wR2(reflections)= 0.1691( 5956)

S = 1.063

Npar= 331

---

The following ALERTS were generated. Each ALERT has the format

**test-name\_ALERT\_alert-type\_alert-level.**

Click on the hyperlinks for more details of the test.

### ● Alert level C

|                   |                                                  |         |        |
|-------------------|--------------------------------------------------|---------|--------|
| PLAT029_ALERT_3_C | _diffn_measured_fraction_theta_full value Low .  | 0.971   | Why?   |
| PLAT309_ALERT_2_C | Single Bonded Oxygen (C-O > 1.3 Ang) .....       | 01D     | Check  |
| PLAT341_ALERT_3_C | Low Bond Precision on C-C Bonds .....            | 0.00982 | Ang.   |
| PLAT906_ALERT_3_C | Large K Value in the Analysis of Variance .....  | 2.715   | Check  |
| PLAT911_ALERT_3_C | Missing FCF Refl Between Thmin & STh/L= 0.600    | 144     | Report |
| PLAT913_ALERT_3_C | Missing # of Very Strong Reflections in FCF .... | 11      | Note   |
| PLAT975_ALERT_2_C | Check Calcd Resid. Dens. 1.06A From 01D          | 1.01    | eA-3   |
| PLAT976_ALERT_2_C | Check Calcd Resid. Dens. 0.91A From 032          | -0.76   | eA-3   |
| PLAT977_ALERT_2_C | Check Negative Difference Density on H32         | -0.63   | eA-3   |

### ● Alert level G

|                   |                                                                                    |         |              |
|-------------------|------------------------------------------------------------------------------------|---------|--------------|
| ABSMU01_ALERT_1_G | Calculation of _exptl_absorpt_correction_mu not performed for this radiation type. |         |              |
| PLAT002_ALERT_2_G | Number of Distance or Angle Restraints on AtSite                                   | 3       | Note         |
| PLAT004_ALERT_5_G | Polymeric Structure Found with Maximum Dimension                                   | 3       | Info         |
| PLAT045_ALERT_1_G | Calculated and Reported Z Differ by a Factor ...                                   | 2.00    | Check        |
| PLAT083_ALERT_2_G | SHELXL Second Parameter in WGHT Unusually Large                                    | 11.26   | Why ?        |
| PLAT092_ALERT_4_G | Check: Wavelength Given is not Cu,Ga,Mo,Ag,In Ka                                   | 0.79313 | Ang.         |
| PLAT154_ALERT_1_G | The s.u.'s on the Cell Angles are Equal..(Note)                                    | 0.016   | Degree       |
| PLAT172_ALERT_4_G | The CIF-Embedded .res File Contains DFIX Records                                   | 2       | Report       |
| PLAT720_ALERT_4_G | Number of Unusual/Non-Standard Labels .....                                        | 9       | Note         |
| PLAT794_ALERT_5_G | Tentative Bond Valency for Zn1 (II)                                                | 2.07    | Info         |
| PLAT860_ALERT_3_G | Number of Least-Squares Restraints .....                                           | 2       | Note         |
| PLAT912_ALERT_4_G | Missing # of FCF Reflections Above STh/L= 0.600                                    | 39      | Note         |
| PLAT933_ALERT_2_G | Number of OMIT Records in Embedded .res File ...                                   | 88      | Note         |
| PLAT941_ALERT_3_G | Average HKL Measurement Multiplicity .....                                         | 2.7     | Low          |
| PLAT961_ALERT_5_G | Dataset Contains no Negative Intensities .....                                     |         | Please Check |
| PLAT978_ALERT_2_G | Number C-C Bonds with Positive Residual Density.                                   | 0       | Info         |
| PLAT984_ALERT_1_G | The Br-f' = -0.8408 Deviates from the B&C-Value                                    | -0.8805 | Check        |
| PLAT984_ALERT_1_G | The Zn-f' = 0.2079 Deviates from the B&C-Value                                     | 0.2043  | Check        |
| PLAT985_ALERT_1_G | The Br-f" = 2.9521 Deviates from the B&C-Value                                     | 2.8944  | Check        |
| PLAT985_ALERT_1_G | The Zn-f" = 1.7386 Deviates from the B&C-Value                                     | 1.7400  | Check        |

0 **ALERT level A** = Most likely a serious problem - resolve or explain  
 0 **ALERT level B** = A potentially serious problem, consider carefully  
 9 **ALERT level C** = Check. Ensure it is not caused by an omission or oversight  
 20 **ALERT level G** = General information/check it is not something unexpected

7 ALERT type 1 CIF construction/syntax error, inconsistent or missing data  
 8 ALERT type 2 Indicator that the structure model may be wrong or deficient  
 7 ALERT type 3 Indicator that the structure quality may be low  
 4 ALERT type 4 Improvement, methodology, query or suggestion  
 3 ALERT type 5 Informative message, check

It is advisable to attempt to resolve as many as possible of the alerts in all categories. Often the minor alerts point to easily fixed oversights, errors and omissions in your CIF or refinement strategy, so attention to these fine details can be worthwhile. In order to resolve some of the more serious problems it may be necessary to carry out additional measurements or structure refinements. However, the purpose of your study may justify the reported deviations and the more serious of these should normally be commented upon in the discussion or experimental section of a paper or in the "special\_details" fields of the CIF. checkCIF was carefully designed to identify outliers and unusual parameters, but every test has its limitations and alerts that are not important in a particular case may appear. Conversely, the absence of alerts does not guarantee there are no aspects of the results needing attention. It is up to the individual to critically assess their own results and, if necessary, seek expert advice.

### **Publication of your CIF in IUCr journals**

A basic structural check has been run on your CIF. These basic checks will be run on all CIFs submitted for publication in IUCr journals (*Acta Crystallographica*, *Journal of Applied Crystallography*, *Journal of Synchrotron Radiation*); however, if you intend to submit to *Acta Crystallographica Section C* or *E* or *IUCrData*, you should make sure that full publication checks are run on the final version of your CIF prior to submission.

### **Publication of your CIF in other journals**

Please refer to the *Notes for Authors* of the relevant journal for any special instructions relating to CIF submission.

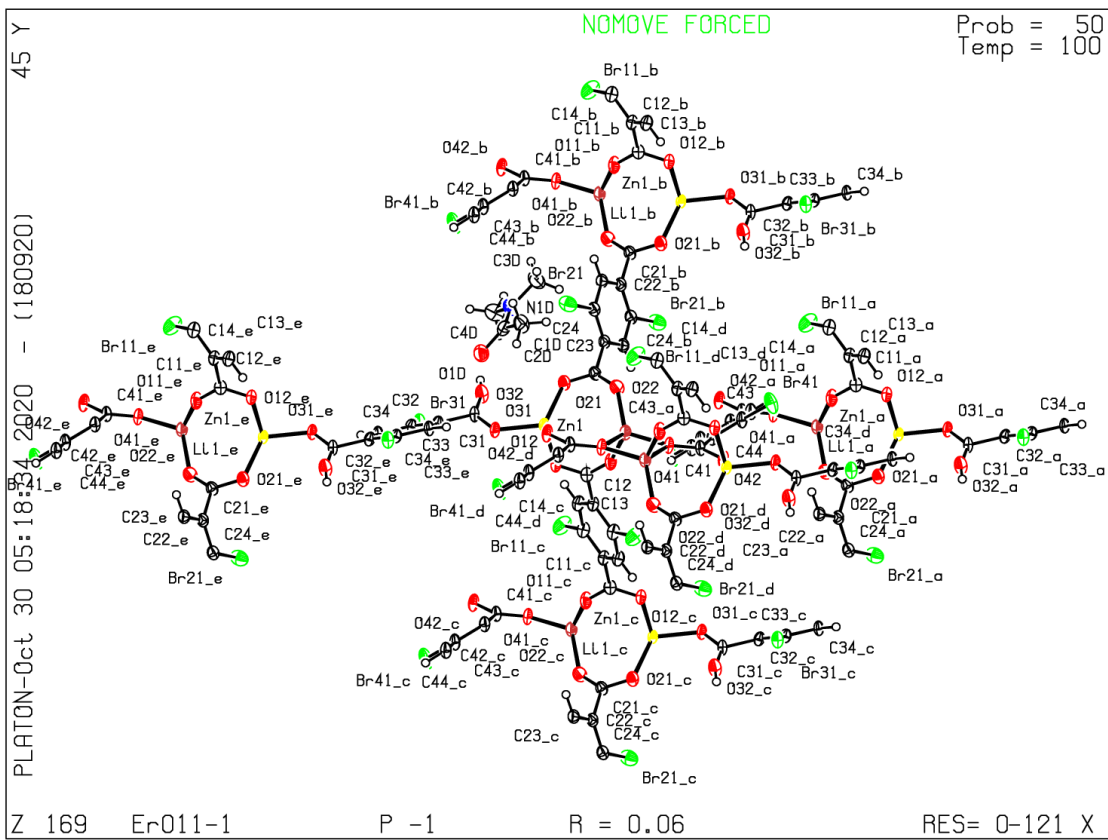

Supplement: s1 [file s1]
