# Supplementary material
Source: MDPI journal article supplement (https://www.mdpi.com/2304-6740/9/1/4)
Supplement: s1 [file s1]

# Supplementary Materials: Influence of Substituents in Terephthalate Linker on the Structure of MOFs Obtained from Presynthesized Heterometallic Complex

Marina Barsukova, Evgeny Dudko, Denis Samsonenko, Konstantin Kovalenko, Alexey Ryadun, Aleksandr Sapiyanik and Vladimir Fedin

**Table S1.** List of selected angles and bond distances for starting complex and compounds 1–4.

| Compound                                                                | Bond distances, Å       | Angles, deg.                       |
|-------------------------------------------------------------------------|-------------------------|------------------------------------|
| [Li <sub>2</sub> Zn <sub>2</sub> (piv) <sub>6</sub> (py) <sub>2</sub> ] |                         | O(3) – Zn(1) – N(1) 95.82(8)       |
|                                                                         |                         | O(1) – Zn(1) – N(1) 96.91(9)       |
|                                                                         |                         | O(5) – Zn(1) – N(1) 103.61(9)      |
|                                                                         | Zn(1) – O(3) 1.9297(18) | O(1) – Zn(1) – O(5) 102.77(9)      |
|                                                                         | Zn(1) – O(5) 1.951(2)   | O(1) – Zn(1) – O(2) 120.42(8)      |
|                                                                         | Zn(1) – O(1) 1.9519(19) | O(3) – Zn(1) – O(5) 129.78(10)     |
|                                                                         | Zn(1) – N(1) 2.067(2)   | O(2) – Li(1) – O(2) 94.4(2)        |
|                                                                         | Li(1) – O(4) 1.889(5)   | O(2) – Li(1) – O(6) 102.6(2)       |
|                                                                         | Li(1) – O(1) 1.902(5)   | O(4) – Li(1) – O(6) 109.4(2)       |
|                                                                         | Li(1) – O(2) 1.936(5)   | O(2) – Li(1) – O(4) 112.0(3)       |
|                                                                         | Li(1) – O(2) 1.985(5)   | O(2) – Li(1) – O(6) 116.0(3)       |
|                                                                         |                         | O(2) – Li(1) – O(4) 120.1(3)       |
|                                                                         |                         | Li(1) – O(2) – Li(1) 85.6(2)       |
| 1                                                                       |                         | O(11) – Zn(1) – O(33) 98.60(11)    |
|                                                                         |                         | O(11) – Zn(1) – O(31) 104.89(11)   |
|                                                                         |                         | O(31) – Zn(1) – O(33) 107.47(12)   |
|                                                                         | Zn(1) – O(21) 1.944(2)  | O(11) – Zn(1) – O(21) 108.26(11)   |
|                                                                         | Zn(1) – O(31) 1.952(2)  | O(21) – Zn(1) – O(33) 108.49(11)   |
|                                                                         | Zn(1) – O(33) 1.961(2)  | O(21) – Zn(1) – O(31) 125.76(11)   |
|                                                                         | Zn(1) – O(11) 1.974(2)  | O(22) – Li(1) – O(22) 94.4(2)      |
|                                                                         | Li(1) – O(32) 1.860(6)  | O(32) – Li(1) – O(34) 108.5(3)     |
|                                                                         | Li(1) – O(34) 1.883(6)  | O(22) – Li(1) – O(32) 111.6(3)     |
|                                                                         | Li(1) – O(22) 1.944(6)  | O(22) – Li(1) – O(32) 112.2(3)     |
|                                                                         | Li(1) – O(22) 1.953(6)  | O(22) – Li(1) – O(34) 113.8(3)     |
|                                                                         |                         | O(22) – Li(1) – O(34) 115.9(3)     |
|                                                                         |                         | Li(1) – O(22) – Li(1) 85.6(2)      |
| 2 <sub>DMA</sub>                                                        |                         | O(31) – Zn(1) – O(42) 96.41(18)    |
|                                                                         |                         | O(12) – Zn(1) – O(31) 96.59(19)    |
|                                                                         |                         | O(12) – Zn(1) – O(21) 112.4(2)     |
|                                                                         |                         | O(12) – Zn(1) – O(42) 114.7(2)     |
|                                                                         |                         | O(21) – Zn(1) – O(42) 116.4(2)     |
|                                                                         | Zn(1) – O(31) 1.933(4)  | O(21) – Zn(1) – O(31) 117.96(19)   |
|                                                                         | Zn(1) – O(21) 1.933(5)  | O(41) – Li(1) – O(41) 92.0(5)      |
|                                                                         | Zn(1) – O(42) 1.943(4)  | O(11) – Li(1) – O(22) 106.5(6)     |
|                                                                         | Zn(1) – O(12) 1.984(4)  | O(11) – Li(1) – O(41) 107.1(6)     |
|                                                                         | Li(1) – O(11) 1.879(13) | O(11) – Li(1) – O(41) 113.2(6)     |
|                                                                         | Li(1) – O(22) 1.885(12) | O(22) – Li(1) – O(41) 116.2(6)     |
|                                                                         | Li(1) – O(41) 1.921(12) | O(22) – Li(1) – O(41) 120.9(6)     |
|                                                                         | Li(1) – O(41) 1.956(12) | Li(1) – O(41) – Li(1) 88.0(5)      |
| 3                                                                       | Zn(1) – O(101) 1.922(2) | O(101) – Zn(1) – O(202) 92.84(10)  |
|                                                                         | Zn(1) – O(103) 1.929(2) | O(103) – Zn(1) – O(202) 98.84(10)  |
|                                                                         | Zn(1) – O(201) 1.960(2) | O(103) – Zn(1) – O(201) 100.92(10) |

|   |                         |                                    |
|---|-------------------------|------------------------------------|
|   | Zn(1) – O(202) 2.001(2) | O(101) – Zn(1) – O(201) 113.94(11) |
|   | Li(1) – O(104) 1.890(5) | O(201) – Zn(1) – O(202) 118.95(10) |
|   | Li(1) – O(102) 1.907(5) | O(101) – Zn(1) – O(103) 131.50(11) |
|   |                         | O(102) – Li(1) – O(102) 104.2(4)   |
|   |                         | O(104) – Li(1) – O(104) 105.7(4)   |
|   |                         | O(102) – Li(1) – O(104) 108.03(12) |
|   |                         | O(102) – Li(1) – O(104) 115.58(11) |
|   |                         | O(11) – Zn(1) – O(1D) 77.44(19)    |
|   |                         | O(22) – Zn(1) – O(1D) 78.51(19)    |
|   |                         | O(1D) – Zn(1) – N(1P) 90.78(17)    |
|   |                         | O(11) – Zn(1) – O(32) 98.46(12)    |
|   |                         | O(32) – Zn(1) – N(1P) 98.77(11)    |
|   |                         | O(11) – Zn(1) – N(1P) 101.36(11)   |
|   |                         | O(22) – Zn(1) – O(32) 101.46(13)   |
|   | Zn(1) – O(22) 1.943(3)  | O(22) – Zn(1) – N(1P) 101.56(12)   |
|   | Zn(1) – O(11) 1.968(2)  | O(11) – Zn(1) – O(22) 146.76(13)   |
|   | Zn(1) – O(32) 2.008(2)  | O(32) – Zn(1) – O(1D) 170.22(17)   |
|   | Zn(1) – N(1P) 2.030(3)  | O(12) – Li(1) – O(12) 94.0(2)      |
|   | Zn(1) – O(1D) 2.303(5)  | O(21) – Li(1) – O(31) 108.6(3)     |
|   | Li(1) – O(21) 1.865(6)  | O(12) – Li(1) – O(21) 112.4(3)     |
|   | Li(1) – O(31) 1.901(6)  | O(12) – Li(1) – O(31) 112.4(3)     |
|   | Li(1) – O(12) 1.927(6)  | O(12) – Li(1) – O(31) 114.0(3)     |
| 4 | Li(1) – O(12) 1.955(6)  | O(21) – Li(1) – O(12) 115.0(3)     |
|   | Zn(2) – O(34) 1.915(3)  | Li(1) – O(12) – Li(1) 86.0(2)      |
|   | Zn(2) – O(24) 1.923(3)  | O(34) – Zn(2) – O(2D) 97.20(13)    |
|   | Zn(2) – O(13) 1.925(2)  | O(24) – Zn(2) – O(2D) 102.15(12)   |
|   | Zn(2) – O(2D) 1.971(3)  | O(13) – Zn(2) – O(2D) 107.25(12)   |
|   | Li(2) – O(14) 1.892(3)  | O(13) – Zn(2) – O(24) 113.69(12)   |
|   | Li(2) – O(23) 1.904(3)  | O(24) – Zn(2) – O(34) 113.75(14)   |
|   | Li(2) – O(33) 1.910(3)  | O(13) – Zn(2) – O(34) 119.46(13)   |
|   | Li(2) – O(3D) 1.967(3)  | O(14) – Li(2) – O(3D) 102.47(14)   |
|   |                         | O(33) – Li(2) – O(3D) 105.39(16)   |
|   |                         | O(23) – Li(2) – O(33) 109.25(15)   |
|   |                         | O(23) – Li(2) – O(3D) 112.07(14)   |
|   |                         | O(14) – Li(2) – O(23) 113.27(14)   |
|   |                         | O(14) – Li(2) – O(33) 113.98(17)   |

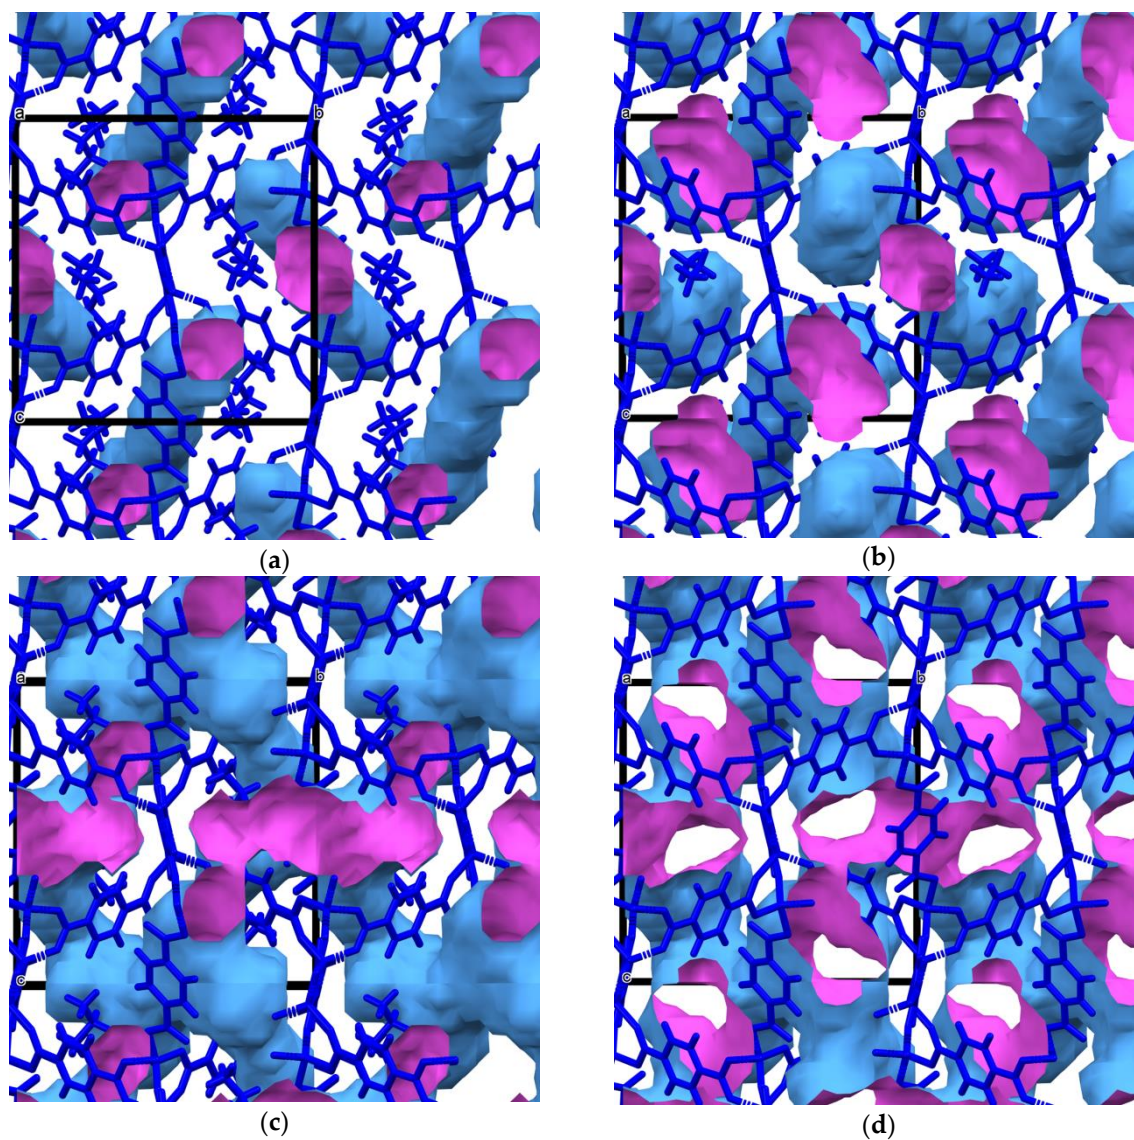

**Figure S1.** (a) Pore representation in **1** with both disordered counterions; (b) Pore representation in **1** with the first type of partly occupied counterions fixed; (c) Pore representation in **1** the second type of partly occupied counterions fixed; (d) Pore representation in **1** without all counterions. Pore inner surface is shown in pink, outer surface – in blue. Framework and counterions are shown in dark blue.

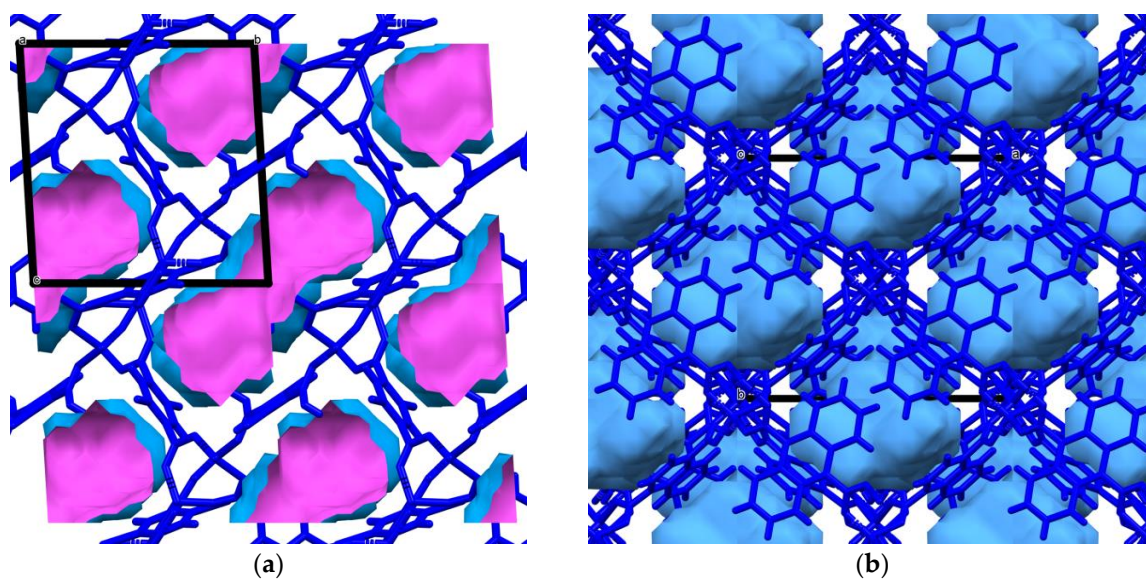

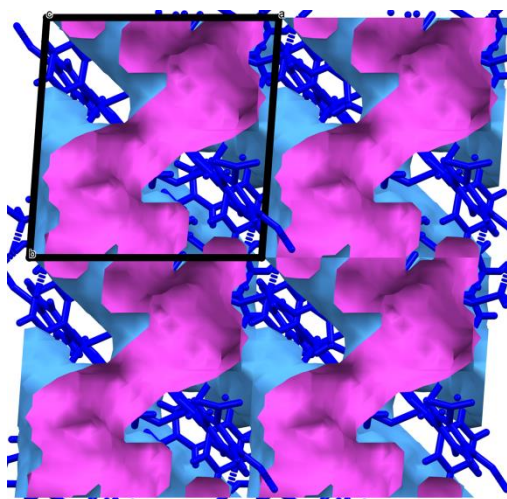

(c)

**Figure S2.** (a) Pore representation in **2**; (b) Pore representation in **3**; (c) Pore representation in **4**. Pore inner surface is shown in pink, outer surface – in blue. Framework is shown in dark blue.

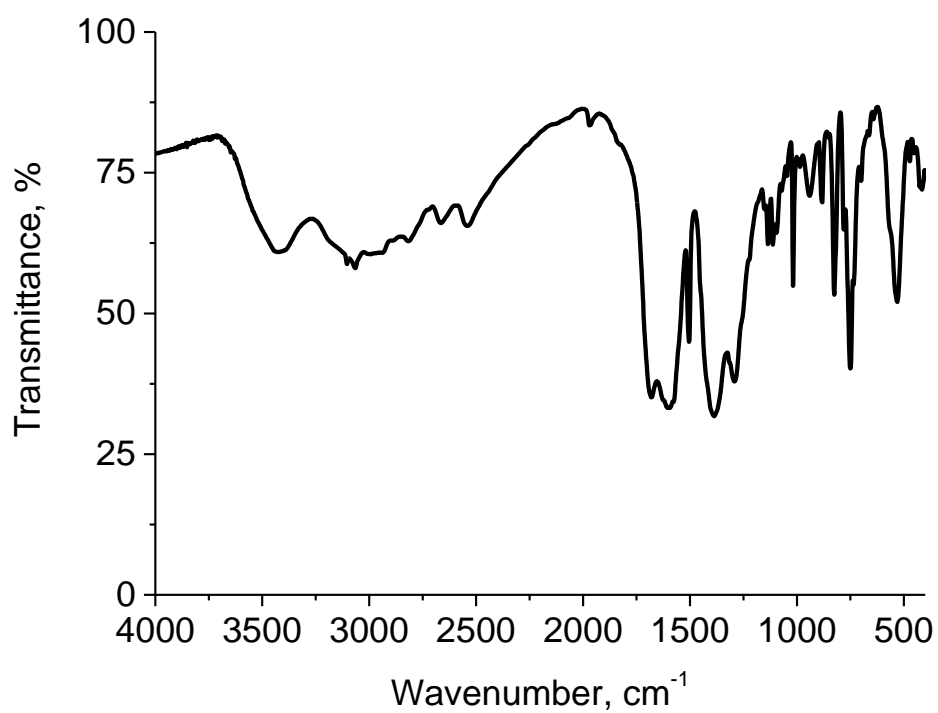

**Figure S3.** IR spectrum of compound **1**.

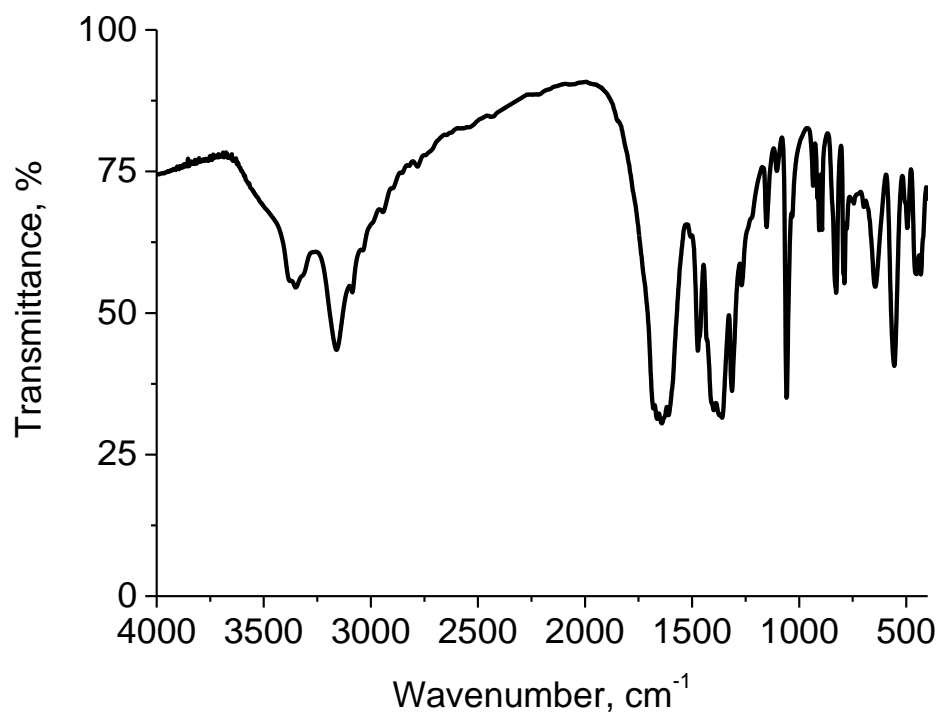

Figure S4. IR spectrum of compound 2.

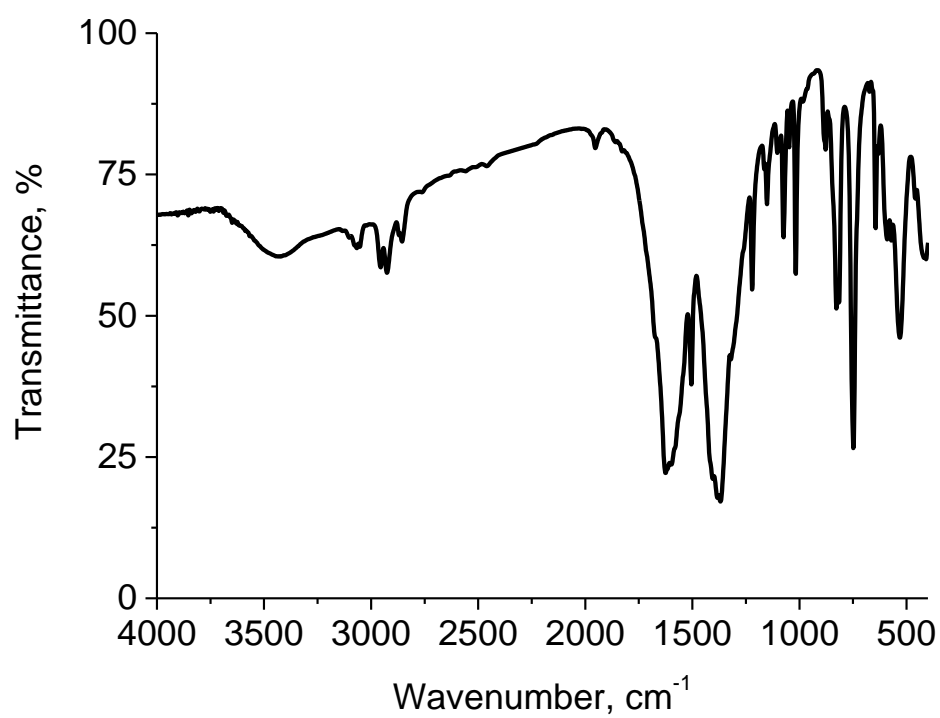

Figure S5. IR spectrum of compound 3.
